# Supplementary material
Source: PubMed Central journal article supplement (PMC5490800)
Supplement: NIHMS870461-supplement-Supporting_Information.pdf [file NIHMS870461-supplement-Supporting_Information.pdf]

## Supporting Information for

### Domain Stability in Biomimetic Membranes Driven by Lipid Tail Unsaturation

Xubo Lin<sup>a</sup>, Joseph H. Lorent<sup>a</sup>, Allison D. Skinkle<sup>a</sup>, Kandice R. Levental<sup>a</sup>, M. Neal Waxham<sup>b</sup>, Alemayehu A Gorfe<sup>a,\*</sup>, and Ilya Levental<sup>a,\*</sup>

a. Department of Integrative Biology and Pharmacology, McGovern Medical School, The University of Texas Health Science Center at Houston, Texas 77030, USA

b. Department of Neurobiology and Anatomy, McGovern Medical School, The University of Texas Health Science Center at Houston, Texas 77030, USA

E-mail: [ilya.levental@uth.tmc.edu](mailto:ilya.levental@uth.tmc.edu) (IL), [alemayehu.g.abebe@uth.tmc.edu](mailto:alemayehu.g.abebe@uth.tmc.edu) (AAG).

Tel: +1-713-500-5566 (IL), +1-713-500-7538 (AAG)

#### Methods for Additional Analysis:

**Radial Pair Distribution Function.** The 2D radial pair distribution function  $g_{2D}(r)$  is defined as

$$g_{2D}(r) = \lim_{dr \rightarrow 0} \frac{p(r)}{\frac{N}{A} 2\pi r dr}$$

where  $r$  is the (in-plane) distance between centers of mass of two lipids,  $p(r)$  is the average number of pairs found at a distance between  $r$  and  $r + dr$ ,  $A$  is the area of the system in the  $xy$ -plane, and  $N$  is the number of unique pairs:  $N = n \cdot (n - 1)$  for  $n$  identical particles, and  $N = n1 \cdot n2$  for  $n1$  type 1 lipids and  $n2$  type 2 lipids.[1]

**Diffusion Coefficient.** Diffusion coefficient  $D$  is calculated based on the Einstein relation:

$$MSD(t) = \langle \vec{r}_i(t) - \vec{r}_i(0) \rangle = nDt$$

where  $\vec{r}_i(t)$  is position of molecule  $i$  at time  $t$ ,  $\langle \vec{r}_i(t) - \vec{r}_i(0) \rangle$  is the mean square displacement (MSD), and  $n$  is the numerical constant which depends on dimensionality:  $n = 2, 4, 6$ , for 1, 2, or 3 dimensional diffusion. The diffusion coefficient  $D$  is calculated by least squares fitting a straight line through the  $MSD(t)$ . In our simulations, ten 400 ns blocks of the last 4  $\mu$ s trajectories of 20  $\mu$ s simulations were used for calculating diffusion coefficient. For the fluid phase, lipid diffusion coefficient is expected to be larger than  $10^{-8} cm^2/s$ . [2]

**Domain Thickness.** PO4-type beads (colored in tan, Fig. S1) of saturated/unsaturated lipids are used for bilayer thickness calculation. In order to avoid the effects of membrane undulation on the bilayer thickness calculation, we divided the whole membrane into  $14 \times 14$  small patches ( $\sim 1.3nm \times 1.3nm$ ), calculated the local thickness of each patch, and then averaged over all patches. For certain system, there is no obvious domain formation. Hence, we re-phrase this thickness as “*head-to-head distance along z axis*” in Fig. S2 and Fig. S3.

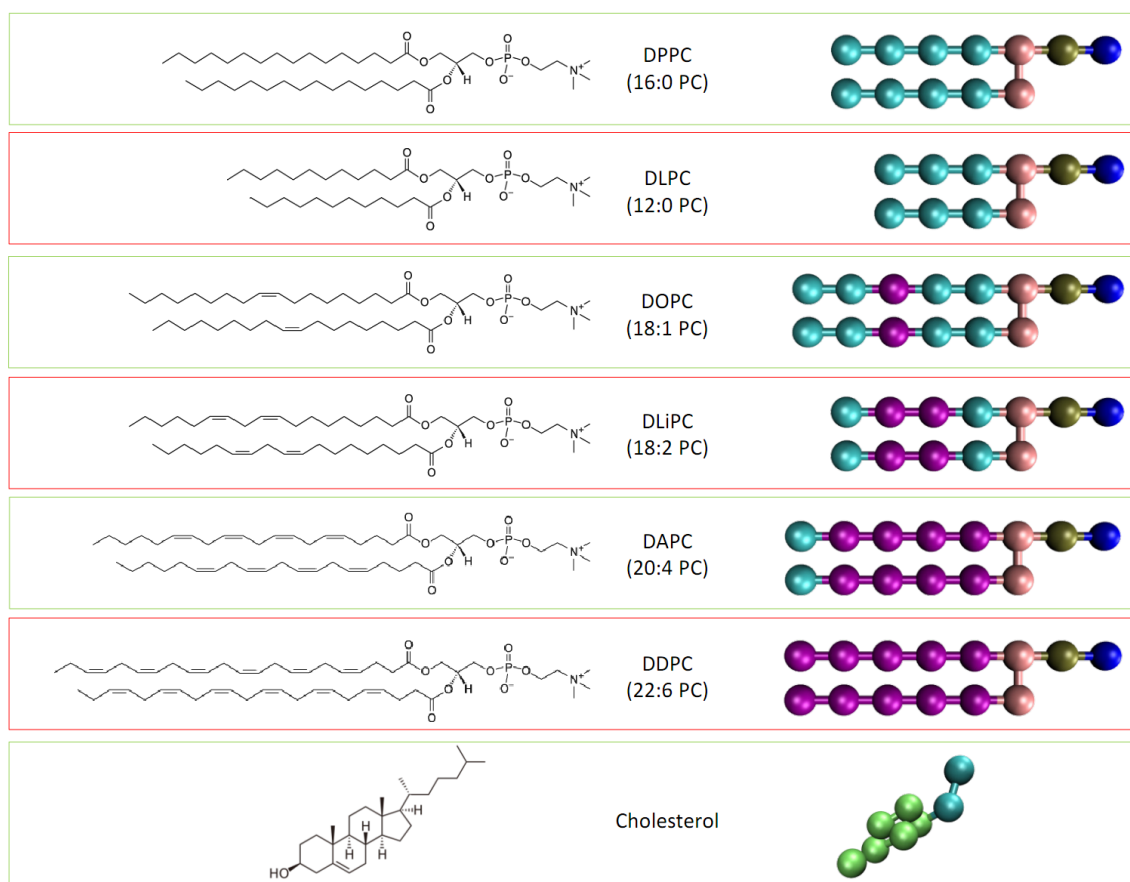

**Figure S1.** Chemical structure (left) and Martini-based configuration (right) of lipids studied in the current work.

**Table S1.** Detailed synaptic membrane lipidome

| Lipid Sub-species                      | Headgroup Class | Length | Double Bonds | Mean $\pm$ s.d. (mol%) |
|----------------------------------------|-----------------|--------|--------------|------------------------|
| Cer-36:1;2                             | Cer             | 36     | 1            | 0.314 $\pm$ 0.044      |
| Cer-36:2;2                             | Cer             | 36     | 2            | 0.071 $\pm$ 0.006      |
| Cer-37:2;2                             | Cer             | 37     | 2            | 0.003 $\pm$ 0.001      |
| Cer-38:1;2                             | Cer             | 38     | 1            | 0.032 $\pm$ 0.006      |
| Cer-38:2;2                             | Cer             | 38     | 2            | 0.005 $\pm$ 0.000      |
| Cer-39:1;2                             | Cer             | 39     | 1            | 0.001 $\pm$ 0.001      |
| Cer-40:1;2                             | Cer             | 40     | 1            | 0.003 $\pm$ 0.001      |
| Cer-41:1;2                             | Cer             | 41     | 1            | 0.003 $\pm$ 0.001      |
| Cer-42:1;2                             | Cer             | 42     | 1            | 0.002 $\pm$ 0.001      |
| Cer-42:2;2                             | Cer             | 42     | 2            | 0.003 $\pm$ 0.000      |
| chol                                   | ST              | 0      | 0            | 33.181 $\pm$ 0.959     |
| CL-68:2;0(16:0;0-18:1;0-16:0;0-18:1;0) | CL              | 68     | 2            | 0.004 $\pm$ 0.005      |
| CL-68:4;0(16:1;0-18:1;0-16:1;0-18:1;0) | CL              | 68     | 4            | 0.020 $\pm$ 0.028      |
| CL-70:3;0(16:1;0-18:0;0-18:2;0-18:0;0) | CL              | 70     | 3            | 0.002 $\pm$ 0.003      |

|                                         |        |    |    |             |
|-----------------------------------------|--------|----|----|-------------|
| CL-70:4;0(16:1;0-18:1;0-18:1;0-18:1;0)  | CL     | 70 | 4  | 0.008±0.011 |
| CL-70:5;0(16:1;0-18:1;0-18:2;0-18:1;0)  | CL     | 70 | 5  | 0.008±0.011 |
| CL-72:4;0(18:1;0-18:1;0-18:1;0-18:1;0)  | CL     | 72 | 4  | 0.017±0.024 |
| CL-72:6;0(18:2;0-18:2;0-18:2;0-18:0;0)  | CL     | 72 | 6  | 0.016±0.022 |
| CL-72:7;0(18:2;0-18:2;0-18:2;0-18:1;0)  | CL     | 72 | 7  | 0.019±0.027 |
| CL-72:8;0(16:1;0-20:4;0-18:2;0-18:1;0)  | CL     | 72 | 8  | 0.011±0.016 |
| CL-74:10;0(16:1;0-20:4;0-20:4;0-18:1;0) | CL     | 74 | 10 | 0.011±0.015 |
| CL-74:11;0(16:1;0-20:4;0-18:2;0-20:4;0) | CL     | 74 | 11 | 0.008±0.011 |
| CL-74:8;0(16:0;0-20:4;0-20:4;0-18:0;0)  | CL     | 74 | 8  | 0.035±0.049 |
| CL-74:9;0(18:2;0-20:4;0-18:2;0-18:1;0)  | CL     | 74 | 9  | 0.018±0.025 |
| CL-76:10;0(18:2;0-20:4;0-20:4;0-18:0;0) | CL     | 76 | 10 | 0.052±0.030 |
| CL-76:11;0(18:2;0-20:4;0-20:4;0-18:1;0) | CL     | 76 | 11 | 0.056±0.005 |
| CL-76:9;0(16:0;0-20:3;0-18:2;0-22:4;0)  | CL     | 76 | 9  | 0.017±0.024 |
| CL-78:13;0(20:4;0-20:4;0-20:4;0-18:1;0) | CL     | 78 | 13 | 0.013±0.018 |
| CL-78:14;0(18:2;0-20:4;0-20:4;0-20:4;0) | CL     | 78 | 14 | 0.007±0.010 |
| CL-80:15;0(18:2;0-22:6;0-22:6;0-18:1;0) | CL     | 80 | 15 | 0.009±0.012 |
| DAG-33:0;0(17:0;0-16:0;0)               | DAG    | 33 | 0  | 0.015±0.022 |
| DAG-34:1;0(18:1;0-16:0;0)               | DAG    | 34 | 1  | 0.070±0.008 |
| DAG-35:0;0(18:0;0-17:0;0)               | DAG    | 35 | 0  | 0.008±0.012 |
| DAG-36:1;0(18:0;0-18:1;0)               | DAG    | 36 | 1  | 0.021±0.004 |
| DAG-36:2;0(18:0;0-18:2;0)               | DAG    | 36 | 2  | 0.001±0.001 |
| DAG-36:2;0(18:1;0-18:1;0)               | DAG    | 36 | 2  | 0.006±0.008 |
| DAG-36:4;0(20:4;0-16:0;0)               | DAG    | 36 | 4  | 0.065±0.004 |
| DAG-38:4;0(18:0;0-20:4;0)               | DAG    | 38 | 4  | 0.380±0.023 |
| DAG-38:5;0(18:1;0-20:4;0)               | DAG    | 38 | 5  | 0.014±0.020 |
| DAG-38:6;0(22:6;0-16:0;0)               | DAG    | 38 | 6  | 0.011±0.015 |
| DAG-40:6;0(18:0;0-22:6;0)               | DAG    | 40 | 6  | 0.010±0.014 |
| HexCer-36:1;2                           | HexCer | 36 | 1  | 0.018±0.001 |
| HexCer-40:1;2                           | HexCer | 40 | 1  | 0.005±0.007 |
| HexCer-40:1;3                           | HexCer | 40 | 1  | 0.046±0.005 |
| HexCer-41:1;3                           | HexCer | 41 | 1  | 0.021±0.003 |
| HexCer-42:1;2                           | HexCer | 42 | 1  | 0.011±0.015 |
| HexCer-42:1;3                           | HexCer | 42 | 1  | 0.117±0.012 |
| HexCer-42:2;2                           | HexCer | 42 | 2  | 0.030±0.001 |
| HexCer-42:2;3                           | HexCer | 42 | 2  | 0.055±0.001 |
| LPA-16:0;0                              | LPA    | 16 | 0  | 0.001±0.002 |
| LPC O--12:1;0(12:1;0)                   | LPC O- | 12 | 1  | 0.018±0.007 |
| LPC O--14:2;0(14:2;0)                   | LPC O- | 14 | 2  | 0.072±0.028 |
| LPC O--16:2;0(16:2;0)                   | LPC O- | 16 | 2  | 0.006±0.002 |

|                       |        |    |   |             |
|-----------------------|--------|----|---|-------------|
| LPC-14:1;0(14:1;0)    | LPC    | 14 | 1 | 0.054±0.023 |
| LPC-14:2;0(14:2;0)    | LPC    | 14 | 2 | 0.007±0.001 |
| LPC-15:0;0(15:0;0)    | LPC    | 15 | 0 | 0.007±0.002 |
| LPC-15:2;0(15:2;0)    | LPC    | 15 | 2 | 0.004±0.005 |
| LPC-15:3;0(15:3;0)    | LPC    | 15 | 3 | 0.002±0.002 |
| LPC-16:0;0(16:0;0)    | LPC    | 16 | 0 | 0.388±0.063 |
| LPC-16:1;0(16:1;0)    | LPC    | 16 | 1 | 0.002±0.003 |
| LPC-17:6;0(17:6;0)    | LPC    | 17 | 6 | 0.009±0.004 |
| LPC-18:0;0(18:0;0)    | LPC    | 18 | 0 | 0.128±0.027 |
| LPC-18:1;0(18:1;0)    | LPC    | 18 | 1 | 0.152±0.038 |
| LPC-18:2;0(18:2;0)    | LPC    | 18 | 2 | 0.008±0.003 |
| LPC-19:2;0(19:2;0)    | LPC    | 19 | 2 | 0.001±0.002 |
| LPC-20:1;0(20:1;0)    | LPC    | 20 | 1 | 0.006±0.001 |
| LPC-20:3;0(20:3;0)    | LPC    | 20 | 3 | 0.001±0.002 |
| LPC-20:4;0(20:4;0)    | LPC    | 20 | 4 | 0.037±0.008 |
| LPC-22:4;0(22:4;0)    | LPC    | 22 | 4 | 0.007±0.002 |
| LPC-22:6;0(22:6;0)    | LPC    | 22 | 6 | 0.031±0.005 |
| LPE O--16:0;0(16:0;0) | LPE O- | 16 | 0 | 0.001±0.001 |
| LPE O--16:1;0(16:1;0) | LPE O- | 16 | 1 | 0.021±0.005 |
| LPE O--18:0;0(18:0;0) | LPE O- | 18 | 0 | 0.001±0.001 |
| LPE O--18:1;0(18:1;0) | LPE O- | 18 | 1 | 0.037±0.008 |
| LPE O--18:2;0(18:2;0) | LPE O- | 18 | 2 | 0.011±0.002 |
| LPE-14:1;0(14:1;0)    | LPE    | 14 | 1 | 0.014±0.003 |
| LPE-16:0;0(16:0;0)    | LPE    | 16 | 0 | 0.041±0.009 |
| LPE-18:0;0(18:0;0)    | LPE    | 18 | 0 | 0.164±0.041 |
| LPE-18:1;0(18:1;0)    | LPE    | 18 | 1 | 0.040±0.009 |
| LPE-18:2;0(18:2;0)    | LPE    | 18 | 2 | 0.001±0.001 |
| LPE-20:1;0(20:1;0)    | LPE    | 20 | 1 | 0.000±0.001 |
| LPE-20:4;0(20:4;0)    | LPE    | 20 | 4 | 0.040±0.010 |
| LPE-22:3;0(22:3;0)    | LPE    | 22 | 3 | 0.002±0.001 |
| LPE-22:4;0(22:4;0)    | LPE    | 22 | 4 | 0.012±0.004 |
| LPE-22:5;0(22:5;0)    | LPE    | 22 | 5 | 0.005±0.002 |
| LPE-22:6;0(22:6;0)    | LPE    | 22 | 6 | 0.081±0.018 |
| LPI-12:4;0            | LPI    | 12 | 4 | 0.011±0.013 |
| LPI-13:4;0            | LPI    | 13 | 4 | 0.008±0.012 |
| LPI-16:1;0            | LPI    | 16 | 1 | 0.001±0.002 |
| LPI-18:0;0            | LPI    | 18 | 0 | 0.024±0.010 |
| LPI-18:1;0            | LPI    | 18 | 1 | 0.001±0.001 |
| LPI-20:4;0            | LPI    | 20 | 4 | 0.003±0.005 |

|                             |       |    |   |             |
|-----------------------------|-------|----|---|-------------|
| LPS-16:0;0                  | LPS   | 16 | 0 | 0.002±0.002 |
| LPS-18:0;0                  | LPS   | 18 | 0 | 0.175±0.037 |
| LPS-18:1;0                  | LPS   | 18 | 1 | 0.023±0.005 |
| LPS-19:4;0                  | LPS   | 19 | 4 | 0.001±0.001 |
| LPS-20:4;0                  | LPS   | 20 | 4 | 0.002±0.002 |
| LPS-22:4;0                  | LPS   | 22 | 4 | 0.002±0.003 |
| LPS-22:5;0                  | LPS   | 22 | 5 | 0.002±0.003 |
| PA-32:0;0(16:0;0-16:0;0)    | PA    | 32 | 0 | 0.004±0.006 |
| PA-34:0;0(18:0;0-16:0;0)    | PA    | 34 | 0 | 0.080±0.114 |
| PA-34:1;0(18:1;0-16:0;0)    | PA    | 34 | 1 | 0.011±0.016 |
| PA-36:1;0(18:0;0-18:1;0)    | PA    | 36 | 1 | 0.006±0.009 |
| PA-36:2;0(18:0;0-18:2;0)    | PA    | 36 | 2 | 0.002±0.003 |
| PA-36:2;0(18:1;0-18:1;0)    | PA    | 36 | 2 | 0.002±0.003 |
| PA-36:4;0(18:2;0-18:2;0)    | PA    | 36 | 4 | 0.001±0.002 |
| PA-36:4;0(20:4;0-16:0;0)    | PA    | 36 | 4 | 0.002±0.003 |
| PA-38:4;0(18:0;0-20:4;0)    | PA    | 38 | 4 | 0.011±0.015 |
| PA-38:5;0(18:1;0-20:4;0)    | PA    | 38 | 5 | 0.002±0.003 |
| PA-40:6;0(18:0;0-22:6;0)    | PA    | 40 | 6 | 0.007±0.010 |
| PC O--32:0;0(16:0;0-16:0;0) | PC O- | 32 | 0 | 0.076±0.031 |
| PC O--32:1;0(14:1;0-18:0;0) | PC O- | 32 | 1 | 0.001±0.002 |
| PC O--32:1;0(16:0;0-16:1;0) | PC O- | 32 | 1 | 0.014±0.002 |
| PC O--32:1;0(16:1;0-16:0;0) | PC O- | 32 | 1 | 0.036±0.007 |
| PC O--34:1;0(16:0;0-18:1;0) | PC O- | 34 | 1 | 0.017±0.024 |
| PC O--34:1;0(16:1;0-18:0;0) | PC O- | 34 | 1 | 0.002±0.002 |
| PC O--34:1;0(18:1;0-16:0;0) | PC O- | 34 | 1 | 0.076±0.034 |
| PC O--34:2;0(18:1;0-16:1;0) | PC O- | 34 | 2 | 0.006±0.008 |
| PC-30:0;0(12:0;0-18:0;0)    | PC    | 30 | 0 | 0.002±0.003 |
| PC-30:0;0(14:0;0-16:0;0)    | PC    | 30 | 0 | 0.075±0.014 |
| PC-31:0;0(14:0;0-17:0;0)    | PC    | 31 | 0 | 0.003±0.002 |
| PC-31:0;0(15:0;0-16:0;0)    | PC    | 31 | 0 | 0.037±0.002 |
| PC-32:0;0(14:0;0-18:0;0)    | PC    | 32 | 0 | 0.282±0.050 |
| PC-32:0;0(15:0;0-17:0;0)    | PC    | 32 | 0 | 0.013±0.018 |
| PC-32:0;0(16:0;0-16:0;0)    | PC    | 32 | 0 | 6.665±0.159 |
| PC-32:1;0(14:0;0-18:1;0)    | PC    | 32 | 1 | 0.022±0.003 |
| PC-32:1;0(16:1;0-16:0;0)    | PC    | 32 | 1 | 0.163±0.001 |
| PC-32:2;0(16:1;0-16:1;0)    | PC    | 32 | 2 | 0.251±0.355 |
| PC-32:2;0(16:2;0-16:0;0)    | PC    | 32 | 2 | 0.147±0.208 |
| PC-32:3;0(14:3;0-18:0;0)    | PC    | 32 | 3 | 0.695±0.052 |
| PC-32:4;0(15:4;0-17:0;0)    | PC    | 32 | 4 | 0.006±0.008 |

|                          |    |    |   |             |
|--------------------------|----|----|---|-------------|
| PC-33:0;0(15:0;0-18:0;0) | PC | 33 | 0 | 0.010±0.003 |
| PC-33:1;0(15:0;0-18:1;0) | PC | 33 | 1 | 0.108±0.019 |
| PC-33:1;0(16:0;0-17:1;0) | PC | 33 | 1 | 0.165±0.028 |
| PC-33:4;0(15:4;0-18:0;0) | PC | 33 | 4 | 0.014±0.005 |
| PC-34:0;0(16:0;0-18:0;0) | PC | 34 | 0 | 1.773±0.137 |
| PC-34:1;0(16:0;0-18:1;0) | PC | 34 | 1 | 9.675±0.239 |
| PC-34:1;0(16:1;0-18:0;0) | PC | 34 | 1 | 0.062±0.006 |
| PC-34:2;0(16:0;0-18:2;0) | PC | 34 | 2 | 0.241±0.001 |
| PC-34:2;0(16:1;0-18:1;0) | PC | 34 | 2 | 0.055±0.002 |
| PC-34:3;0(16:1;0-18:2;0) | PC | 34 | 3 | 0.003±0.004 |
| PC-34:3;0(18:3;0-16:0;0) | PC | 34 | 3 | 0.019±0.004 |
| PC-34:4;0(12:0;0-22:4;0) | PC | 34 | 4 | 0.027±0.038 |
| PC-35:0;0(17:0;0-18:0;0) | PC | 35 | 0 | 0.011±0.015 |
| PC-35:1;0(16:0;0-19:1;0) | PC | 35 | 1 | 0.023±0.009 |
| PC-35:1;0(17:1;0-18:0;0) | PC | 35 | 1 | 0.016±0.004 |
| PC-35:2;0(17:1;0-18:1;0) | PC | 35 | 2 | 0.070±0.099 |
| PC-36:1;0(16:0;0-20:1;0) | PC | 36 | 1 | 0.252±0.002 |
| PC-36:1;0(18:1;0-18:0;0) | PC | 36 | 1 | 1.646±0.029 |
| PC-36:2;0(16:0;0-20:2;0) | PC | 36 | 2 | 0.084±0.007 |
| PC-36:2;0(18:1;0-18:1;0) | PC | 36 | 2 | 0.379±0.025 |
| PC-36:2;0(18:2;0-18:0;0) | PC | 36 | 2 | 0.070±0.001 |
| PC-36:3;0(16:0;0-20:3;0) | PC | 36 | 3 | 0.061±0.005 |
| PC-36:3;0(18:2;0-18:1;0) | PC | 36 | 3 | 0.024±0.002 |
| PC-36:4;0(16:0;0-20:4;0) | PC | 36 | 4 | 1.658±0.033 |
| PC-36:5;0(16:1;0-20:4;0) | PC | 36 | 5 | 0.465±0.657 |
| PC-37:4;0(20:4;0-17:0;0) | PC | 37 | 4 | 0.053±0.004 |
| PC-38:1;0(16:0;0-22:1;0) | PC | 38 | 1 | 0.009±0.002 |
| PC-38:1;0(18:0;0-20:1;0) | PC | 38 | 1 | 0.022±0.006 |
| PC-38:1;0(18:1;0-20:0;0) | PC | 38 | 1 | 0.003±0.005 |
| PC-38:2;0(16:0;0-22:2;0) | PC | 38 | 2 | 0.002±0.003 |
| PC-38:2;0(18:0;0-20:2;0) | PC | 38 | 2 | 0.028±0.004 |
| PC-38:2;0(18:1;0-20:1;0) | PC | 38 | 2 | 0.027±0.001 |
| PC-38:3;0(18:1;0-20:2;0) | PC | 38 | 3 | 0.001±0.002 |
| PC-38:3;0(20:3;0-18:0;0) | PC | 38 | 3 | 0.005±0.007 |
| PC-38:4;0(16:0;0-22:4;0) | PC | 38 | 4 | 0.276±0.022 |
| PC-38:4;0(18:1;0-20:3;0) | PC | 38 | 4 | 0.035±0.004 |
| PC-38:4;0(20:4;0-18:0;0) | PC | 38 | 4 | 1.149±0.003 |
| PC-38:5;0(16:0;0-22:5;0) | PC | 38 | 5 | 0.123±0.012 |
| PC-38:5;0(20:4;0-18:1;0) | PC | 38 | 5 | 0.246±0.030 |

|                             |       |    |   |             |
|-----------------------------|-------|----|---|-------------|
| PC-38:6;0(16:0;0-22:6;0)    | PC    | 38 | 6 | 1.138±0.057 |
| PC-38:6;0(18:2;0-20:4;0)    | PC    | 38 | 6 | 0.017±0.000 |
| PC-38:7;0(16:1;0-22:6;0)    | PC    | 38 | 7 | 0.015±0.022 |
| PC-39:5;0(17:0;0-22:5;0)    | PC    | 39 | 5 | 0.041±0.004 |
| PC-39:6;0(22:6;0-17:0;0)    | PC    | 39 | 6 | 0.023±0.007 |
| PC-40:4;0(18:0;0-22:4;0)    | PC    | 40 | 4 | 0.139±0.002 |
| PC-40:5;0(18:1;0-22:4;0)    | PC    | 40 | 5 | 0.018±0.003 |
| PC-40:5;0(20:4;0-20:1;0)    | PC    | 40 | 5 | 0.013±0.001 |
| PC-40:5;0(22:5;0-18:0;0)    | PC    | 40 | 5 | 0.035±0.004 |
| PC-40:6;0(18:1;0-22:5;0)    | PC    | 40 | 6 | 0.024±0.034 |
| PC-40:6;0(20:4;0-20:2;0)    | PC    | 40 | 6 | 0.009±0.001 |
| PC-40:6;0(22:6;0-18:0;0)    | PC    | 40 | 6 | 0.548±0.010 |
| PC-40:7;0(22:6;0-18:1;0)    | PC    | 40 | 7 | 0.178±0.010 |
| PC-40:8;0(20:4;0-20:4;0)    | PC    | 40 | 8 | 0.020±0.002 |
| PE O--32:1;0(16:1;0-16:0;0) | PE O- | 32 | 1 | 0.013±0.018 |
| PE O--34:1;0(16:0;0-18:1;0) | PE O- | 34 | 1 | 0.010±0.014 |
| PE O--34:1;0(18:1;0-16:0;0) | PE O- | 34 | 1 | 0.067±0.010 |
| PE O--34:2;0(16:1;0-18:1;0) | PE O- | 34 | 2 | 0.111±0.021 |
| PE O--34:2;0(18:2;0-16:0;0) | PE O- | 34 | 2 | 0.071±0.006 |
| PE O--36:1;0(18:0;0-18:1;0) | PE O- | 36 | 1 | 0.013±0.003 |
| PE O--36:2;0(18:1;0-18:1;0) | PE O- | 36 | 2 | 0.183±0.020 |
| PE O--36:3;0(18:2;0-18:1;0) | PE O- | 36 | 3 | 0.188±0.033 |
| PE O--36:4;0(16:0;0-20:4;0) | PE O- | 36 | 4 | 0.047±0.014 |
| PE O--36:4;0(16:1;0-20:3;0) | PE O- | 36 | 4 | 0.012±0.017 |
| PE O--36:5;0(16:1;0-20:4;0) | PE O- | 36 | 5 | 0.678±0.083 |
| PE O--37:5;0(17:1;0-20:4;0) | PE O- | 37 | 5 | 0.010±0.013 |
| PE O--38:2;0(18:1;0-20:1;0) | PE O- | 38 | 2 | 0.010±0.014 |
| PE O--38:4;0(16:0;0-22:4;0) | PE O- | 38 | 4 | 0.047±0.000 |
| PE O--38:4;0(18:0;0-20:4;0) | PE O- | 38 | 4 | 0.034±0.003 |
| PE O--38:4;0(18:1;0-20:3;0) | PE O- | 38 | 4 | 0.021±0.003 |
| PE O--38:5;0(16:0;0-22:5;0) | PE O- | 38 | 5 | 0.003±0.004 |
| PE O--38:5;0(16:1;0-22:4;0) | PE O- | 38 | 5 | 0.418±0.170 |
| PE O--38:5;0(18:1;0-20:4;0) | PE O- | 38 | 5 | 0.672±0.313 |
| PE O--38:5;0(21:5;0-17:0;0) | PE O- | 38 | 5 | 0.672±0.147 |
| PE O--38:6;0(16:0;0-22:6;0) | PE O- | 38 | 6 | 0.070±0.005 |
| PE O--38:6;0(16:1;0-22:5;0) | PE O- | 38 | 6 | 0.068±0.001 |
| PE O--38:6;0(18:2;0-20:4;0) | PE O- | 38 | 6 | 0.368±0.023 |
| PE O--38:7;0(16:1;0-22:6;0) | PE O- | 38 | 7 | 1.397±0.117 |
| PE O--39:7;0(17:1;0-22:6;0) | PE O- | 39 | 7 | 0.020±0.028 |

|                             |       |    |   |             |
|-----------------------------|-------|----|---|-------------|
| PE O--40:4;0(18:0;0-22:4;0) | PE O- | 40 | 4 | 0.059±0.004 |
| PE O--40:5;0(18:0;0-22:5;0) | PE O- | 40 | 5 | 0.015±0.002 |
| PE O--40:5;0(18:1;0-22:4;0) | PE O- | 40 | 5 | 0.593±0.040 |
| PE O--40:6;0(18:0;0-22:6;0) | PE O- | 40 | 6 | 0.068±0.004 |
| PE O--40:6;0(18:1;0-22:5;0) | PE O- | 40 | 6 | 0.082±0.002 |
| PE O--40:6;0(18:2;0-22:4;0) | PE O- | 40 | 6 | 0.135±0.024 |
| PE O--40:7;0(18:1;0-22:6;0) | PE O- | 40 | 7 | 2.569±0.212 |
| PE O--40:8;0(18:2;0-22:6;0) | PE O- | 40 | 8 | 0.440±0.049 |
| PE O--42:7;0(20:1;0-22:6;0) | PE O- | 42 | 7 | 0.019±0.026 |
| PE-32:0;0(16:0;0-16:0;0)    | PE    | 32 | 0 | 0.025±0.001 |
| PE-34:0;0(16:0;0-18:0;0)    | PE    | 34 | 0 | 0.089±0.009 |
| PE-34:1;0(16:0;0-18:1;0)    | PE    | 34 | 1 | 0.371±0.001 |
| PE-34:1;0(16:1;0-18:0;0)    | PE    | 34 | 1 | 0.012±0.001 |
| PE-34:2;0(16:0;0-18:2;0)    | PE    | 34 | 2 | 0.008±0.001 |
| PE-34:2;0(16:1;0-18:1;0)    | PE    | 34 | 2 | 0.010±0.001 |
| PE-35:2;0(17:1;0-18:1;0)    | PE    | 35 | 2 | 0.003±0.004 |
| PE-36:1;0(16:0;0-20:1;0)    | PE    | 36 | 1 | 0.012±0.001 |
| PE-36:1;0(18:1;0-18:0;0)    | PE    | 36 | 1 | 0.337±0.007 |
| PE-36:2;0(16:0;0-20:2;0)    | PE    | 36 | 2 | 0.004±0.001 |
| PE-36:2;0(17:1;0-19:1;0)    | PE    | 36 | 2 | 0.000±0.001 |
| PE-36:2;0(18:1;0-18:1;0)    | PE    | 36 | 2 | 0.431±0.007 |
| PE-36:2;0(18:2;0-18:0;0)    | PE    | 36 | 2 | 0.022±0.000 |
| PE-36:3;0(16:0;0-20:3;0)    | PE    | 36 | 3 | 0.010±0.000 |
| PE-36:3;0(18:2;0-18:1;0)    | PE    | 36 | 3 | 0.016±0.002 |
| PE-36:4;0(16:0;0-20:4;0)    | PE    | 36 | 4 | 0.344±0.000 |
| PE-36:4;0(16:1;0-20:3;0)    | PE    | 36 | 4 | 0.001±0.001 |
| PE-36:4;0(18:2;0-18:2;0)    | PE    | 36 | 4 | 0.004±0.001 |
| PE-37:4;0(20:4;0-17:0;0)    | PE    | 37 | 4 | 0.018±0.002 |
| PE-38:1;0(18:0;0-20:1;0)    | PE    | 38 | 1 | 0.005±0.007 |
| PE-38:2;0(18:0;0-20:2;0)    | PE    | 38 | 2 | 0.002±0.003 |
| PE-38:2;0(18:1;0-20:1;0)    | PE    | 38 | 2 | 0.004±0.005 |
| PE-38:4;0(16:0;0-22:4;0)    | PE    | 38 | 4 | 0.215±0.005 |
| PE-38:4;0(18:1;0-20:3;0)    | PE    | 38 | 4 | 0.034±0.001 |
| PE-38:4;0(20:4;0-18:0;0)    | PE    | 38 | 4 | 3.606±0.071 |
| PE-38:5;0(16:0;0-22:5;0)    | PE    | 38 | 5 | 0.153±0.004 |
| PE-38:5;0(20:4;0-18:1;0)    | PE    | 38 | 5 | 0.346±0.010 |
| PE-38:5;0(20:5;0-18:0;0)    | PE    | 38 | 5 | 0.003±0.004 |
| PE-38:6;0(16:0;0-22:6;0)    | PE    | 38 | 6 | 1.344±0.027 |
| PE-38:6;0(18:2;0-20:4;0)    | PE    | 38 | 6 | 0.027±0.006 |



|                           |    |    |    |             |
|---------------------------|----|----|----|-------------|
| PE-38:7;0(16:1;0-22:6;0)  | PE | 38 | 7  | 0.008±0.000 |
| PE-39:6;0(22:6;0-17:0;0)  | PE | 39 | 6  | 0.024±0.002 |
| PE-40:4;0(18:0;0-22:4;0)  | PE | 40 | 4  | 0.586±0.027 |
| PE-40:4;0(20:4;0-20:0;0)  | PE | 40 | 4  | 0.003±0.004 |
| PE-40:5;0(18:1;0-22:4;0)  | PE | 40 | 5  | 0.032±0.005 |
| PE-40:5;0(20:4;0-20:1;0)  | PE | 40 | 5  | 0.003±0.004 |
| PE-40:5;0(22:5;0-18:0;0)  | PE | 40 | 5  | 0.225±0.044 |
| PE-40:6;0(18:1;0-22:5;0)  | PE | 40 | 6  | 0.100±0.002 |
| PE-40:6;0(22:6;0-18:0;0)  | PE | 40 | 6  | 5.105±0.052 |
| PE-40:7;0(22:6;0-18:1;0)  | PE | 40 | 7  | 0.331±0.012 |
| PE-40:8;0(20:4;0-20:4;0)  | PE | 40 | 8  | 0.029±0.000 |
| PE-42:10;0(20:4;0-22:6;0) | PE | 42 | 10 | 0.009±0.012 |
| PE-42:8;0(20:4;0-22:4;0)  | PE | 42 | 8  | 0.032±0.001 |
| PE-44:10;0(22:5;0-22:5;0) | PE | 44 | 10 | 0.001±0.001 |
| PE-44:10;0(22:6;0-22:4;0) | PE | 44 | 10 | 0.079±0.010 |
| PE-44:8;0(22:4;0-22:4;0)  | PE | 44 | 8  | 0.006±0.009 |
| PG-34:0;0(16:0;0-18:0;0)  | PG | 34 | 0  | 0.006±0.002 |
| PG-34:1;0(16:0;0-18:1;0)  | PG | 34 | 1  | 0.036±0.002 |
| PG-34:1;0(16:1;0-18:0;0)  | PG | 34 | 1  | 0.003±0.000 |
| PG-35:0;0(17:0;0-18:0;0)  | PG | 35 | 0  | 0.001±0.001 |
| PG-35:1;0(17:0;0-18:1;0)  | PG | 35 | 1  | 0.001±0.001 |
| PG-36:0;0(17:0;0-19:0;0)  | PG | 36 | 0  | 0.001±0.001 |
| PG-36:0;0(18:0;0-18:0;0)  | PG | 36 | 0  | 0.000±0.001 |
| PG-36:4;0(16:0;0-20:4;0)  | PG | 36 | 4  | 0.021±0.004 |
| PG-38:4;0(16:0;0-22:4;0)  | PG | 38 | 4  | 0.008±0.001 |
| PG-38:4;0(20:4;0-18:0;0)  | PG | 38 | 4  | 0.018±0.003 |
| PG-38:5;0(20:4;0-18:1;0)  | PG | 38 | 5  | 0.004±0.001 |
| PG-44:12;0(22:6;0-22:6;0) | PG | 44 | 12 | 0.009±0.000 |
| PI-34:0;0(17:0;0-17:0;0)  | PI | 34 | 0  | 0.004±0.006 |
| PI-34:0;0(18:0;0-16:0;0)  | PI | 34 | 0  | 0.004±0.006 |
| PI-36:1;0(18:0;0-18:1;0)  | PI | 36 | 1  | 0.002±0.002 |
| PI-36:1;0(20:1;0-16:0;0)  | PI | 36 | 1  | 0.000±0.001 |
| PI-36:2;0(18:0;0-18:2;0)  | PI | 36 | 2  | 0.000±0.001 |
| PI-36:2;0(18:1;0-18:1;0)  | PI | 36 | 2  | 0.001±0.001 |
| PI-36:4;0(20:4;0-16:0;0)  | PI | 36 | 4  | 0.157±0.016 |
| PI-37:4;0(17:0;0-20:4;0)  | PI | 37 | 4  | 0.003±0.004 |
| PI-38:4;0(18:0;0-20:4;0)  | PI | 38 | 4  | 0.944±0.011 |
| PI-38:4;0(22:4;0-16:0;0)  | PI | 38 | 4  | 0.005±0.007 |
| PI-38:5;0(18:1;0-20:4;0)  | PI | 38 | 5  | 0.087±0.017 |

|                           |    |    |    |             |
|---------------------------|----|----|----|-------------|
| PI-38:6;0(20:4;0-18:2;0)  | PI | 38 | 6  | 0.001±0.002 |
| PI-38:6;0(22:6;0-16:0;0)  | PI | 38 | 6  | 0.010±0.015 |
| PI-40:4;0(22:4;0-18:0;0)  | PI | 40 | 4  | 0.074±0.104 |
| PI-40:5;0(22:4;0-18:1;0)  | PI | 40 | 5  | 0.005±0.008 |
| PI-40:6;0(18:0;0-22:6;0)  | PI | 40 | 6  | 0.026±0.003 |
| PI-40:6;0(20:2;0-20:4;0)  | PI | 40 | 6  | 0.000±0.001 |
| PI-40:8;0(20:4;0-20:4;0)  | PI | 40 | 8  | 0.002±0.002 |
| PS-34:0;0(16:0;0-18:0;0)  | PS | 34 | 0  | 0.067±0.095 |
| PS-34:1;0(16:0;0-18:1;0)  | PS | 34 | 1  | 0.189±0.030 |
| PS-34:1;0(16:1;0-18:0;0)  | PS | 34 | 1  | 0.003±0.005 |
| PS-36:1;0(18:1;0-18:0;0)  | PS | 36 | 1  | 0.452±0.013 |
| PS-36:2;0(18:1;0-18:1;0)  | PS | 36 | 2  | 0.346±0.016 |
| PS-36:2;0(18:2;0-18:0;0)  | PS | 36 | 2  | 0.022±0.015 |
| PS-36:3;0(18:2;0-18:1;0)  | PS | 36 | 3  | 0.005±0.007 |
| PS-36:4;0(16:0;0-20:4;0)  | PS | 36 | 4  | 0.009±0.012 |
| PS-38:1;0(18:0;0-20:1;0)  | PS | 38 | 1  | 0.004±0.005 |
| PS-38:1;0(18:1;0-20:0;0)  | PS | 38 | 1  | 0.001±0.002 |
| PS-38:2;0(18:0;0-20:2;0)  | PS | 38 | 2  | 0.003±0.004 |
| PS-38:2;0(18:1;0-20:1;0)  | PS | 38 | 2  | 0.002±0.003 |
| PS-38:2;0(19:1;0-19:1;0)  | PS | 38 | 2  | 0.000±0.000 |
| PS-38:3;0(20:3;0-18:0;0)  | PS | 38 | 3  | 0.011±0.015 |
| PS-38:4;0(16:0;0-22:4;0)  | PS | 38 | 4  | 0.008±0.011 |
| PS-38:4;0(20:4;0-18:0;0)  | PS | 38 | 4  | 0.004±0.006 |
| PS-38:5;0(14:1;0-24:4;0)  | PS | 38 | 5  | 0.001±0.001 |
| PS-38:5;0(20:4;0-18:1;0)  | PS | 38 | 5  | 0.021±0.030 |
| PS-38:6;0(16:0;0-22:6;0)  | PS | 38 | 6  | 0.032±0.046 |
| PS-40:1;0(18:1;0-22:0;0)  | PS | 40 | 1  | 0.003±0.004 |
| PS-40:4;0(18:0;0-22:4;0)  | PS | 40 | 4  | 0.381±0.004 |
| PS-40:5;0(22:5;0-18:0;0)  | PS | 40 | 5  | 0.242±0.039 |
| PS-40:6;0(22:6;0-18:0;0)  | PS | 40 | 6  | 4.795±0.308 |
| PS-40:7;0(22:6;0-18:1;0)  | PS | 40 | 7  | 0.047±0.066 |
| PS-42:4;0(18:0;0-24:4;0)  | PS | 42 | 4  | 0.005±0.007 |
| PS-44:10;0(22:5;0-22:5;0) | PS | 44 | 10 | 0.001±0.001 |
| PS-44:10;0(22:6;0-22:4;0) | PS | 44 | 10 | 0.027±0.038 |
| PS-44:11;0(22:6;0-22:5;0) | PS | 44 | 11 | 0.005±0.007 |
| PS-44:12;0(22:6;0-22:6;0) | PS | 44 | 12 | 0.013±0.018 |
| SM-33:1;2                 | SM | 33 | 1  | 0.008±0.002 |
| SM-34:1;2                 | SM | 34 | 1  | 0.043±0.006 |
| SM-35:1;2                 | SM | 35 | 1  | 0.034±0.002 |

|           |    |    |   |             |
|-----------|----|----|---|-------------|
| SM-35:4;2 | SM | 35 | 4 | 0.045±0.010 |
| SM-36:1;2 | SM | 36 | 1 | 1.792±0.147 |
| SM-36:1;3 | SM | 36 | 1 | 0.014±0.001 |
| SM-36:2;2 | SM | 36 | 2 | 0.113±0.007 |
| SM-37:2;2 | SM | 37 | 2 | 0.030±0.008 |
| SM-37:4;2 | SM | 37 | 4 | 0.014±0.001 |
| SM-38:1;2 | SM | 38 | 1 | 0.184±0.017 |
| SM-40:1;2 | SM | 40 | 1 | 0.010±0.003 |
| SM-42:2;2 | SM | 42 | 2 | 0.019±0.001 |

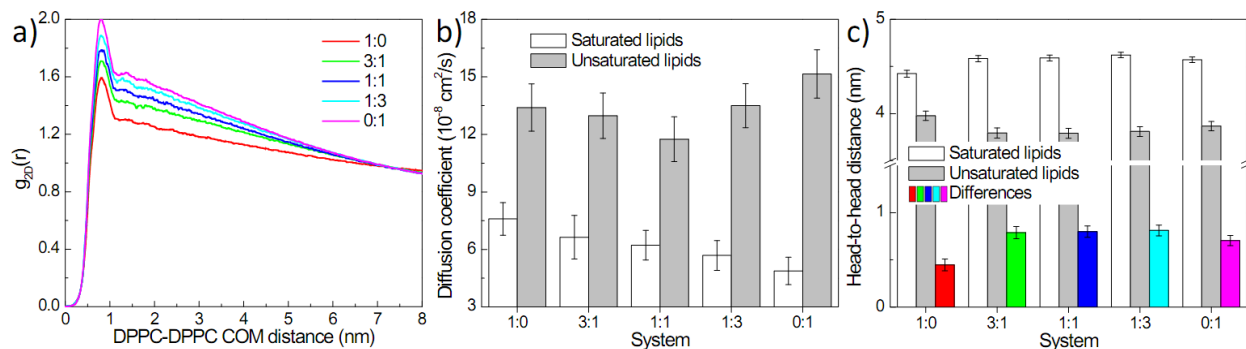

**Figure S2.** Four-component lipid systems with increasing DDPC molar ratio (ratios shown are DLiPC:DDPC): **a)** Two-dimensional (2D) radial pair distribution function of DPPC molecules; **b)** Diffusion coefficients of saturated lipids and unsaturated lipids indicate that all lipids are in the fluid phase; **c)** Head-to-head (phosphate-to-phosphate) distance along z axis of saturated lipids, unsaturated lipids and their differences.

**Table S2.** Dataset for Fig. 2 c-e

| System                          | Saturated lipids | Unsaturated lipids | Differences |
|---------------------------------|------------------|--------------------|-------------|
| Order parameter, $S_z$          |                  |                    |             |
| 1:0                             | 0.674±0.014      | 0.320±0.013        | 0.354±0.018 |
| 3:1                             | 0.694±0.013      | 0.284±0.012        | 0.410±0.017 |
| 1:1                             | 0.700±0.013      | 0.259±0.011        | 0.441±0.016 |
| 1:3                             | 0.717±0.013      | 0.235±0.012        | 0.482±0.016 |
| 0:1                             | 0.730±0.014      | 0.212±0.012        | 0.519±0.017 |
| Lipid height, h (nm)            |                  |                    |             |
| 1:0                             | 1.893±0.013      | 1.468±0.016        | 0.425±0.019 |
| 3:1                             | 1.911±0.012      | 1.437±0.017        | 0.473±0.019 |
| 1:1                             | 1.914±0.011      | 1.420±0.017        | 0.493±0.020 |
| 1:3                             | 1.925±0.012      | 1.408±0.019        | 0.518±0.021 |
| 0:1                             | 1.930±0.012      | 1.395±0.020        | 0.535±0.022 |
| Cholesterol preference*, $\chi$ |                  |                    |             |
| 1:0                             | 0.847±0.015      | 0.153±0.015        | 0.693±0.015 |
| 3:1                             | 0.891±0.010      | 0.109±0.010        | 0.782±0.020 |
| 1:1                             | 0.914±0.009      | 0.086±0.009        | 0.827±0.018 |
| 1:3                             | 0.941±0.008      | 0.059±0.008        | 0.882±0.016 |
| 0:1                             | 0.965±0.006      | 0.035±0.006        | 0.930±0.006 |

\*Since sum of the cholesterol preferences for saturated and unsaturated lipids equals 1, they share the same standard deviation.

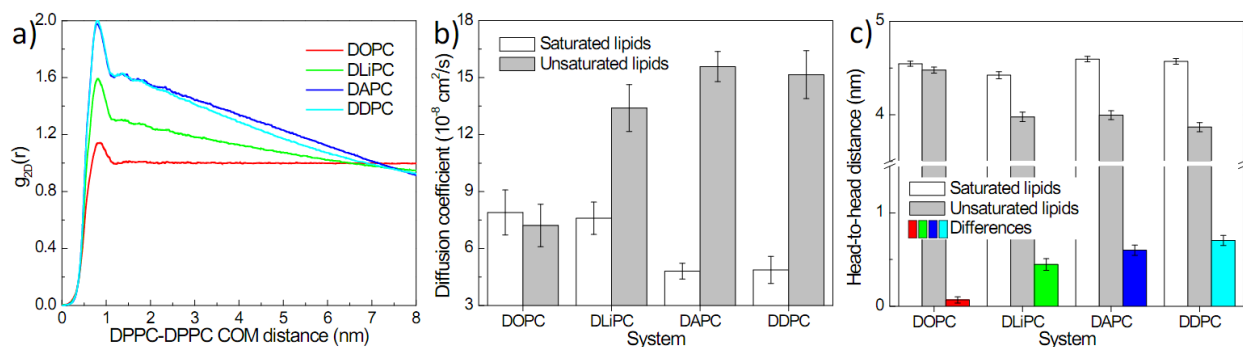

**Figure S3.** Three-component lipid systems with increasing unsaturation of unsaturated lipids: **a)** Two-dimensional (2D) radial pair distribution function of DPPC molecules; **b)** Diffusion coefficients of saturated lipids and unsaturated lipids indicate that all lipids are in the fluid phase; **c)** Head-to-head (phosphate-to-phosphate) distance along  $z$  axis of saturated lipids, unsaturated lipids and their differences.

**Table S3.** Dataset for **Fig. 3 c-e**

| System                          | Saturated lipids | Unsaturated lipids | Differences  |
|---------------------------------|------------------|--------------------|--------------|
| Order parameter, $S_z$          |                  |                    |              |
| DOPC                            | 0.619±0.011      | 0.497±0.012        | 0.122±0.013  |
| DLiPC                           | 0.674±0.014      | 0.320±0.013        | 0.354±0.018  |
| DAPC                            | 0.737±0.014      | 0.236±0.011        | 0.501±0.017  |
| DDPC                            | 0.730±0.014      | 0.211±0.012        | 0.519±0.017  |
| Lipid height, $h$ (nm)          |                  |                    |              |
| DOPC                            | 1.852±0.011      | 2.024±0.017        | -0.172±0.017 |
| DLiPC                           | 1.893±0.013      | 1.468±0.016        | 0.425±0.019  |
| DAPC                            | 1.939±0.012      | 1.536±0.019        | 0.403±0.022  |
| DDPC                            | 1.930±0.012      | 1.395±0.020        | 0.535±0.022  |
| Cholesterol preference*, $\chi$ |                  |                    |              |
| DOPC                            | 0.642±0.012      | 0.358±0.012        | 0.285±0.012  |
| DLiPC                           | 0.847±0.015      | 0.153±0.015        | 0.693±0.015  |
| DAPC                            | 0.939±0.009      | 0.061±0.009        | 0.878±0.009  |
| DDPC                            | 0.965±0.006      | 0.035±0.006        | 0.930±0.006  |

\*Since sum of the cholesterol preferences for saturated and unsaturated lipids equals 1, they share the same standard deviation.

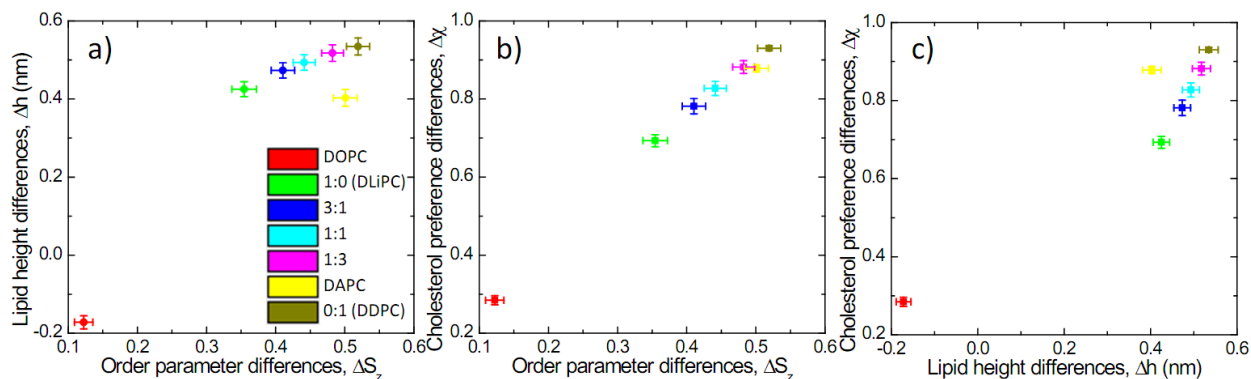

**Figure S4.** Correlation among the differences of the lipid chain order parameter  $S_z$ , lipid height  $h$  and cholesterol preference  $\chi$  between  $L_o$  and  $L_d$  domains. Results in **(a-c)** are obtained via analyzing the last 4  $\mu$ s trajectories of 20  $\mu$ s simulations, and error represents the standard deviation. Order parameter differences correlate best with cholesterol preference differences.

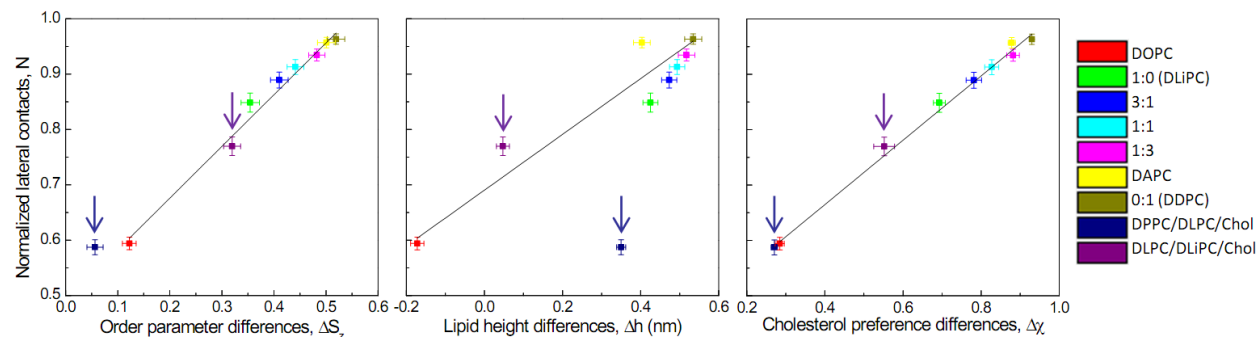

**Figure S5.** Figure 4 of the main text, including data from the DPPC/DLPC/Chol and DLPC/DLiPC/Chol systems, showing that differences in lipid chain order and cholesterol preference show improved correlation with normalized lateral contacts of unsaturated lipids that measure domain size / stability.

**Supporting references:**

1. Hong, C., D.P. Tieleman, and Y. Wang, *Microsecond molecular dynamics simulations of lipid mixing. Langmuir*, **2014**, 30, 11993-12001.
2. Dick, R.A. and V.M. Vogt, *Membrane interaction of retroviral Gag proteins. Front. Microbiol.*, **2014**, 5, 187.
